# Supplementary material for: Nitrogen-doped carbon nanoparticle modulated turn-on fluorescent probes for histidine detection and its imaging in living cells
Source: Royal Society of Chemistry journal article supplement (doi:10.1039/c5nr07826a), 2016-01-01
Supplement: c5nr07826a1.pdf [file c5nr07826a1.pdf]

## Supporting Information

### **Nitrogen-doped carbon nanoparticles modulated turn-on fluorescence probes for histidine detection and its imaging in living cells**

Xiaohua Zhu,<sup>a,b</sup> Tingbi Zhao,<sup>b</sup> Zhou Nie,<sup>\*a</sup> Zhuang Miao,<sup>c</sup> Yang Liu<sup>\*b</sup> Shouzhao Yao<sup>a</sup>

<sup>a</sup> State Key Laboratory of Chemo/Biosensing and Chemometrics, College of Chemistry and Chemical Engineering, Hunan University, Changsha 410082, People's Republic of China.

<sup>b</sup> Department of Chemistry, Beijing Key Laboratory for Analytical Methods and Instrumentation, Key Lab of Bioorganic Phosphorus Chemistry and Chemical Biology of Ministry of Education, Tsinghua University, Beijing 100084, China.

<sup>c</sup> Departments of Neurosurgery, China-Japan Union Hospital of Jilin University, Changchun, Jilin 130033, China.

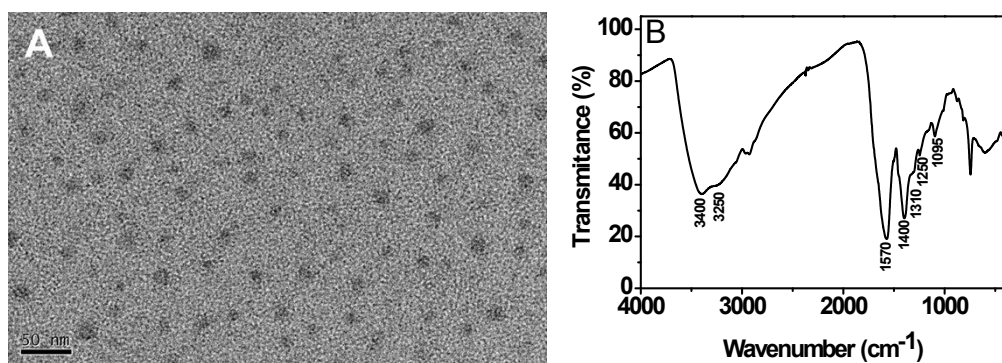

Fig. S1 (A) TEM image and (B) FT-IR spectra of the N-CNPs.

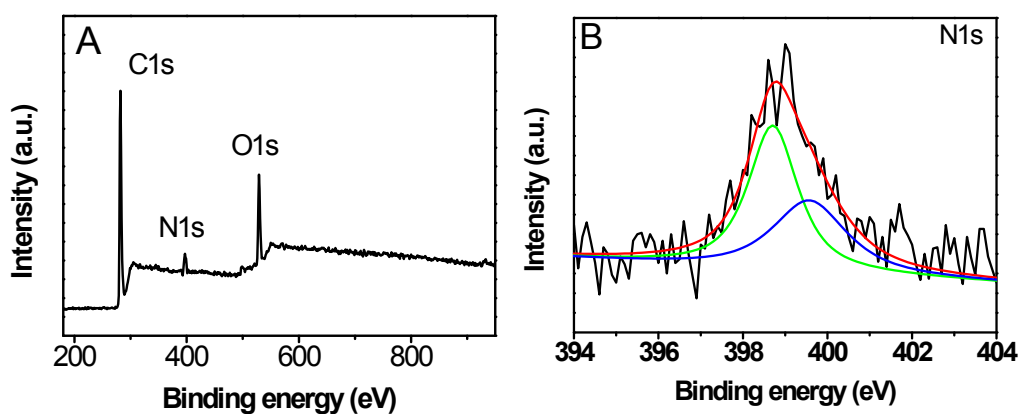

Fig. S2 (A) Survey XPS and (B) N1s spectra of the N-CNPs.

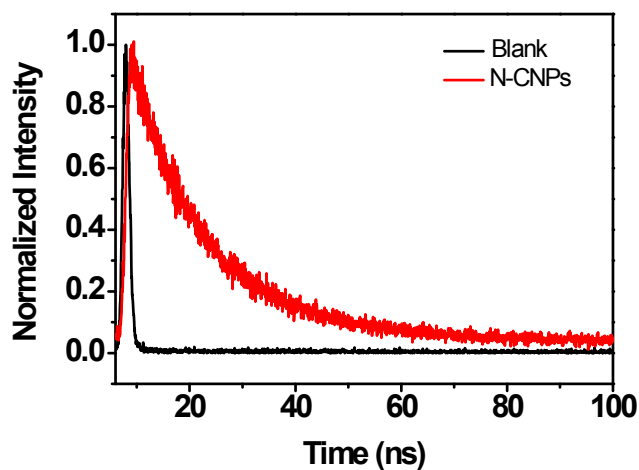

Fig. S3 Time-resolved fluorescence decay of N-CNPs. The black line was the instrument response function.  $\tau = \tau_1 + \tau_2 = 7.50 \times 22\% + 18.00 \times 78\% = 15.69$  ns.

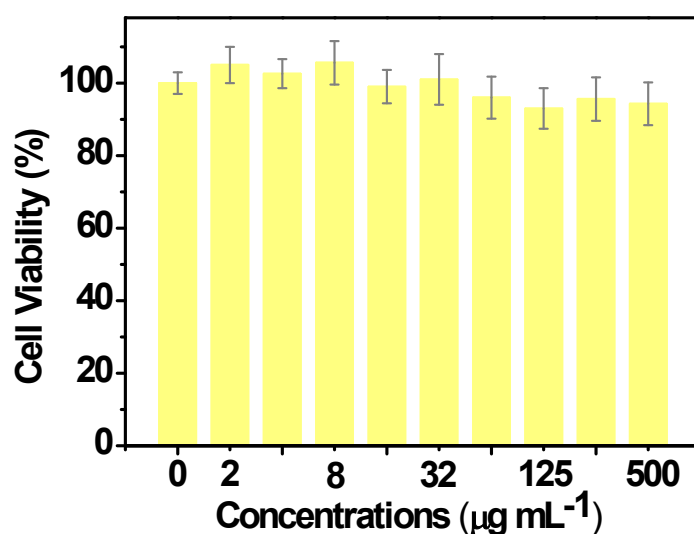

**Fig. S4** Cell viability after incubation with N-CNPs for 24 h

***In vitro* cytotoxicity characterization.** Cells were cultured and maintained in DMEM medium (GIBCO, Gaithersburg, MD, USA) supplemented with 10 % fetal bovine serum (FBS), 100 U mL<sup>-1</sup> penicillin, 100  $\mu\text{g mL}^{-1}$  streptomycin, 2 mM L-glutamine and 1 mM pyruvate acid at 37 °C in a humidified 5% CO<sub>2</sub> atmosphere. MTT [3-(4, 5-dimethyl-2-thiazolyl)-2, 5-diphenyltetrazolium bromide] assay was performed to evaluate the cytotoxic activities of N-CNPs to the cultured cells. HeLa cells seeded in 96-well plates were exposed to 100  $\mu\text{L}$  of different concentrations (500  $\mu\text{g mL}^{-1}$ , 250  $\mu\text{g mL}^{-1}$ , 125  $\mu\text{g mL}^{-1}$ , 62.5  $\mu\text{g mL}^{-1}$ , 32  $\mu\text{g mL}^{-1}$ , 16  $\mu\text{g mL}^{-1}$ , 8  $\mu\text{g mL}^{-1}$ , 4  $\mu\text{g mL}^{-1}$  and 2  $\mu\text{g mL}^{-1}$ ) of N-CNPs and N-CNPs/Cu<sup>2+</sup> in triplicate. After 24 h of incubation, 10  $\mu\text{l}$  of MTT (5  $\text{mg mL}^{-1}$ ) were added to each well and the plate was incubated for another 4 h. The MTT solution was then removed and 100  $\mu\text{l}$  of dimethyl sulfoxide (DMSO) was added to dissolve the formazan. The optical density was measured at 570 nm using 96-well plate reader (Spectra Max M5 Microplate reader, Molecular Devices, USA). Cell viability was expressed as the percentage of survival cells compared to the cells in untreated control wells.

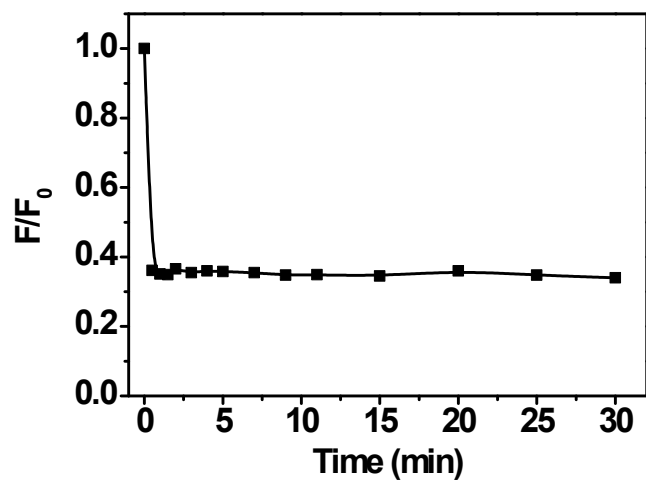

**Fig. S5** Time-dependent fluorescence intensity of N-CNPs with the addition of Cu (II) ions at room temperature.

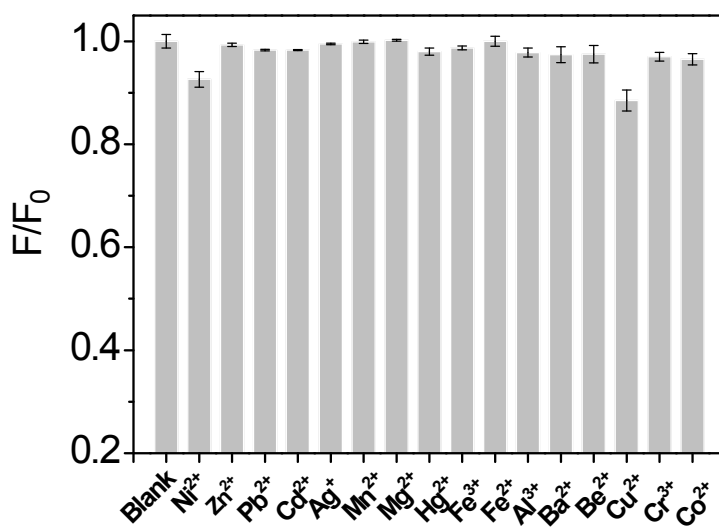

**Fig. S6** The influence of different metal ions on the fluorescence of CNPs.  $F_0$  is the fluorescence intensity of CNPs and  $F$  is the fluorescence intensity of a mixture of metal ions and CNPs.

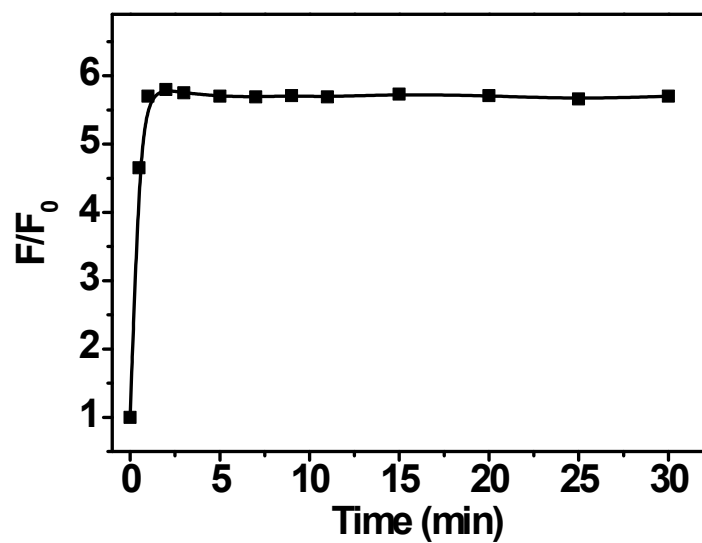

**Fig. S7** Time-dependent fluorescence intensity of N-CNPs/Cu (II) ions with the addition histidine.

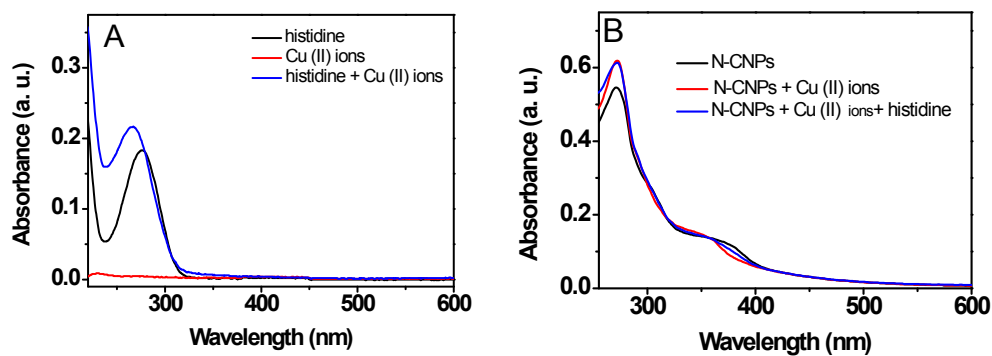

**Fig. S8** (A) UV-vis spectra of histidine (black), Cu (II) ions (red), and the Cu (II) ions histidine complex (blue) in aqueous solution. (B) UV-vis spectra of N-CNPs (black), N-CNPs-Cu (red), N-CNPs- Cu-histidine complex (blue).

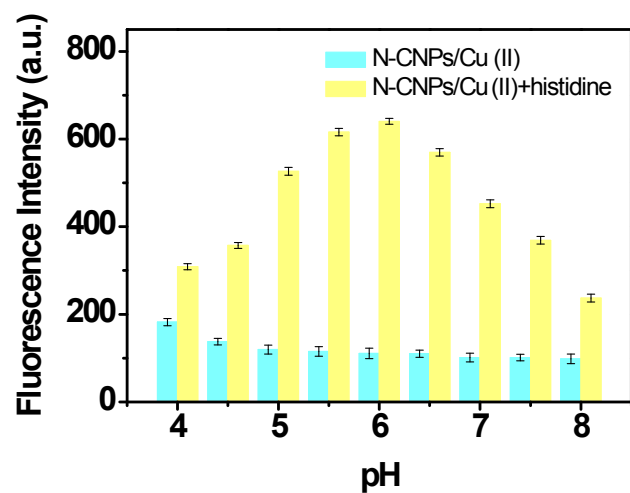

**Fig. S9** Fluorescence responses of N-CNPs/Cu (II) ions in the absence (blue bar) and presence (yellow bar) of histidine at different pH values.

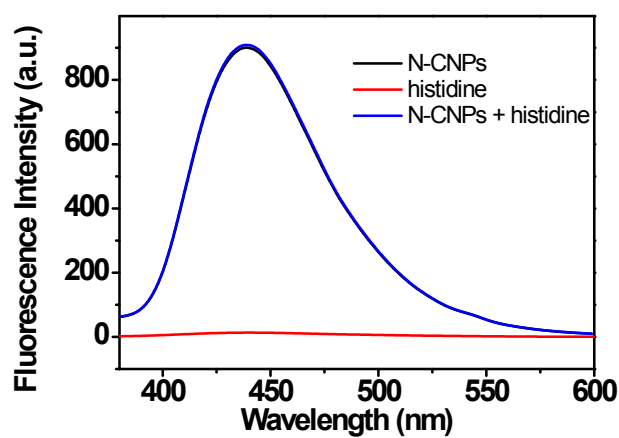

**Fig. S10** Fluorescence response of N-CNPs solution before (black) and after (blue) the addition of 30  $\mu$ M histidine. The red line is the fluorescence spectra of histidine solution.

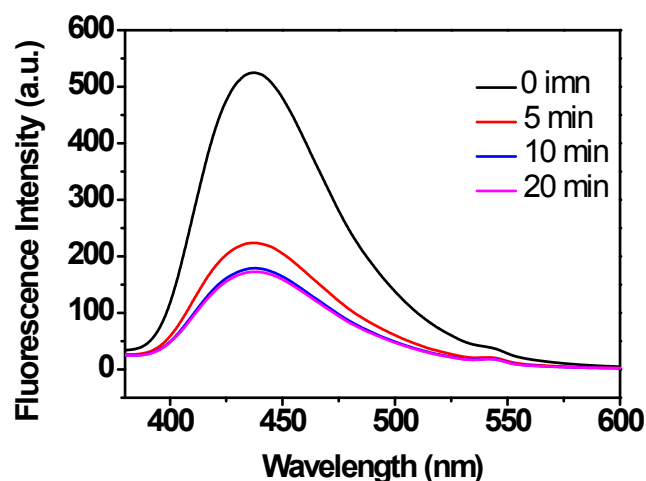

**Fig. S11** Time-dependent fluorescence intensity of N-CNPs/Cu (II) ions with the addition of cysteine at different time.

**Table S1** Comparison of the linear range and detect limit for histidine using different methods

| Method                                            | Linear range ( $\mu\text{M}$ ) | Detection limit ( $\mu\text{M}$ ) | Refs      |
|---------------------------------------------------|--------------------------------|-----------------------------------|-----------|
| HPLC                                              | 3.7 - 1000                     | 1.1                               | 1         |
| Electrochemical                                   | 10 - 100000                    | 5.0                               | 2         |
| Capillary electrophoresis                         | 1.0 - 150                      | 0.14                              | 3         |
| Fluorescence based on Ag NCs/Cu (II) ions         | 0-100                          | 1.4                               | 4         |
| Fluorescence based on CdTe/Ni (II) ions           | 1-30                           | 0.2                               | 5         |
| Phosphorescence based on Mn: ZnS QDs/Co (II) ions | 1.25-30                        | 0.74                              | 6         |
| Fluorescence based on N-CNPs/ Cu (II) ions        | 0.5-60                         | 0.1                               | This work |

1. N. Tateda, K. Matsuhisa, K. Hasebe, N. Kitajima and T. Miura, *J. Chromatogr. B*, 1998, **718**, 235-241.
2. M. K. Amini, S. Shahrokhian and S. Tangestaninejad, *Anal. Chem.*, 1999, **71**, 2502-2505.

3. J. Meng, W. Zhang, C. X. Cao, L. Y. Fan, J. Wu and Q. L. Wang, *Analyst*, 2010, **135**, 1592-1599.
4. Y. Zhou, T. Zhou, M. Zhang and G. Shi, *Analyst*, 2014, **139**, 3122-3126.
5. P. Wu and X. P. Yan, *Biosens. Bioelectron.*, 2010, **26**, 485-490.
6. W. Bian, F. Wang, Y. Wei, L. Wang, Q. Liu, W. Dong, S. Shuang and M. M. F. Choi, *Anal. Chim. Acta.*, 2015, **856**, 82-89.
